# Supplementary material for: Pressure sensitive microparticle adhesion through biomimicry of the pollen–stigma interaction
Source: Royal Society of Chemistry journal article supplement (doi:10.1039/c5sm02845k), 2016-01-01
Supplement: c5sm02845k1.pdf [file c5sm02845k1.pdf]

## Supplementary

# Pressure Sensitive Microparticle Adhesion through Biomimicry of the Pollen-Stigma Interaction

*Haisheng Lin, Zihao Qu and J. Carson Meredith\**

School of Chemical & Biomolecular Engineering, Georgia Institute of Technology, 311 Ferst  
Drive NW, Atlanta, Georgia 30332-0100

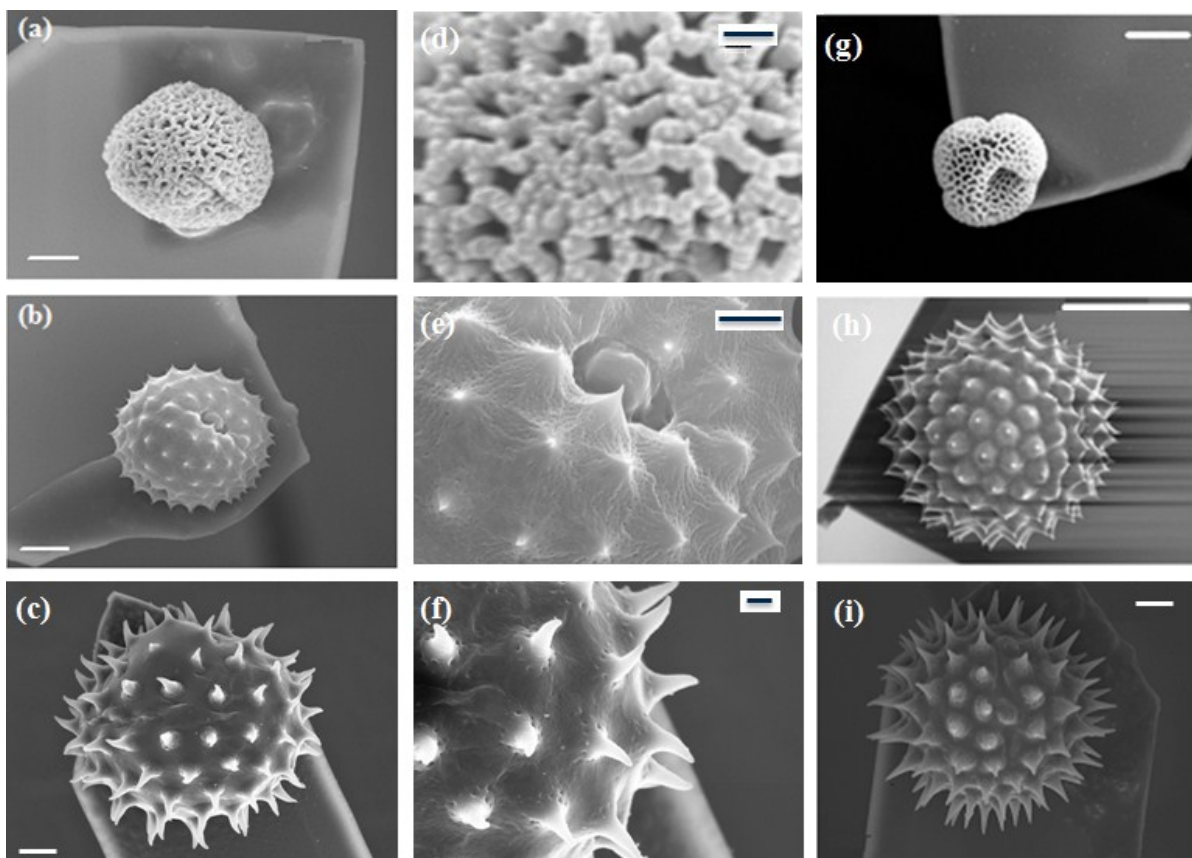

**Figure S1.** SEM images of AFM colloidal-probes of the pollen grains glued to the end of tipless AFM cantilevers. (a) and (d) are the native olive pollen particles; (b) and (e) are the native ragweed pollen particles; (c) and (f) are the native sunflower pollen particles; (g), (h), and (i) the clean particles of olive, ragweed and sunflower pollens respectively. The white scale bar represents 10  $\mu\text{m}$  and the black scale bar is 1  $\mu\text{m}$ .

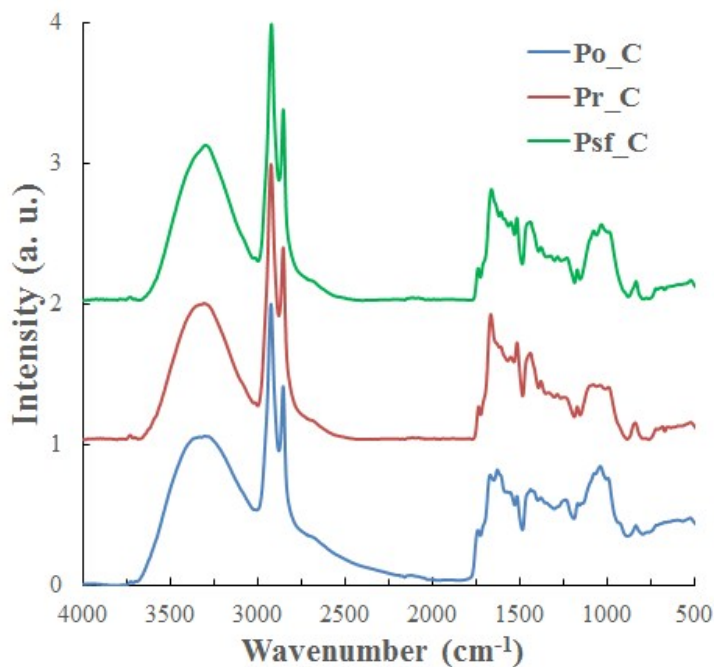

**Figure S2.** FTIR spectra of each cleaned pollen particles.

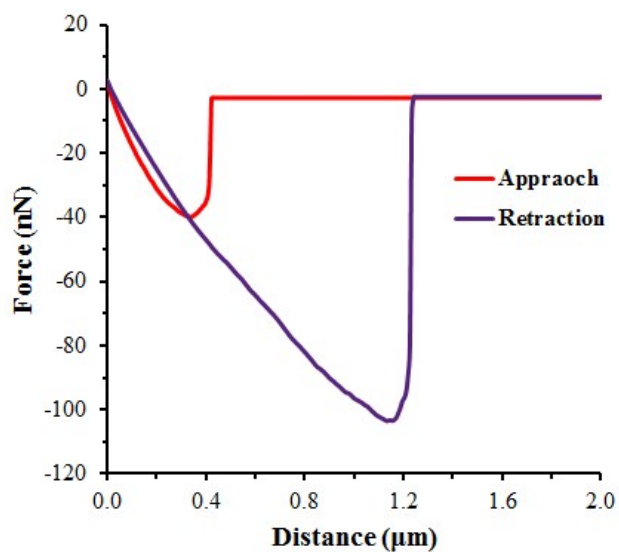

**Figure S3.** A typical force-distance curves for the interactions of a clean sunflower pollen AFM probe (Psf\_C, spring constant 0.5 N/m) and a flat PDMS substrate at 2.5 nN load forces: the gradient in the contact region was  $0.08 \pm 0.01$  N/m.

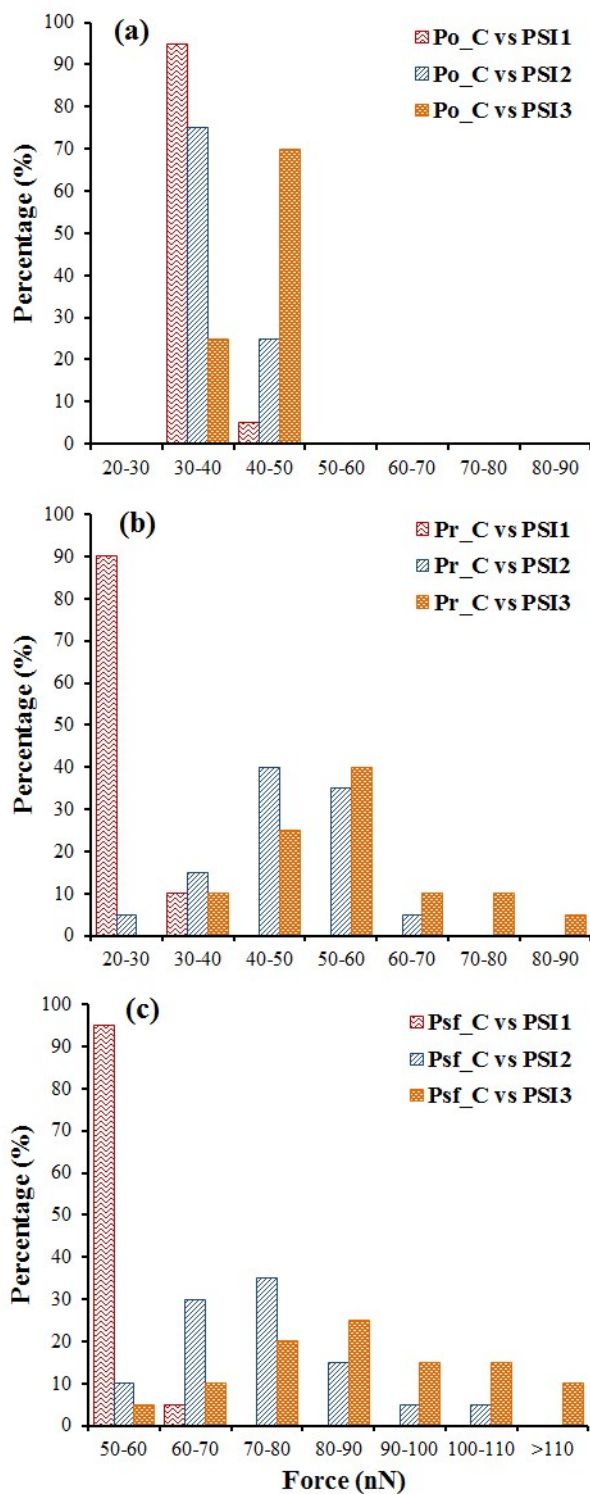

**Figure S4.** Force-distributions for the interactions of pollen AFM probes (a: Po\_C; b: Pr\_C; c: Psf\_C) with three PSI-PS substrates under 2.5 nN load force.

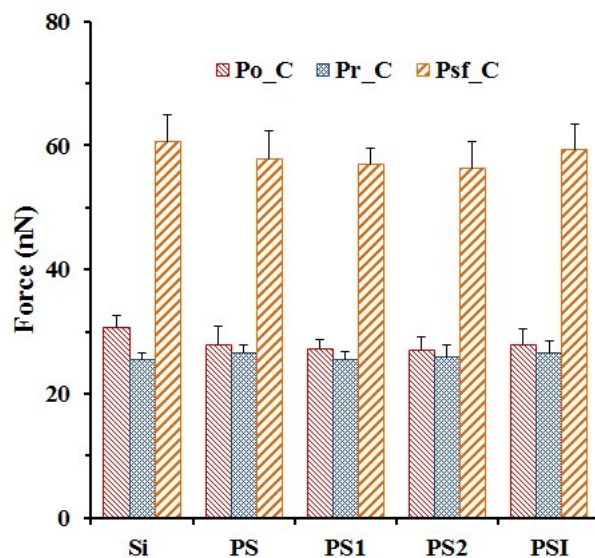

**Figure S5.** Adhesion forces for three clean pollen particles of each species (Po\_C, Pr\_C and Psf\_C) interacting with five different substrate surfaces (Si, PS, PS1, PS2 and PSI) under load force 2.5 nN. Error bars are 95% confidence intervals.

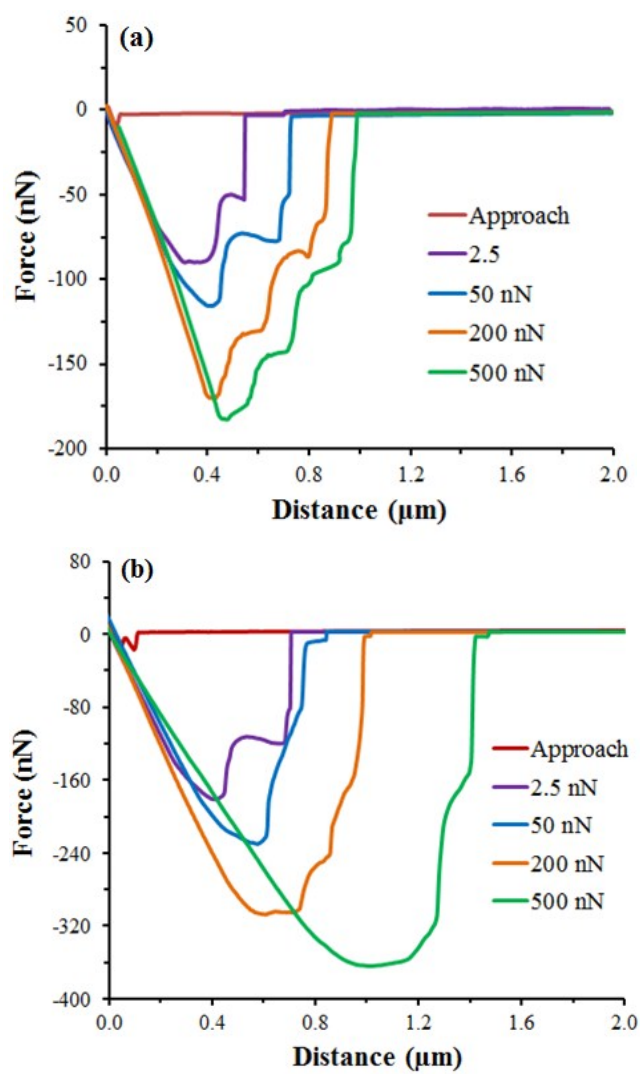

**Figure S6.** Force-distance curves for the interactions of sunflower pollen AFM probes (a: Psf\_C; b: Psf\_N) and PSI3 substrate at a series of load forces.

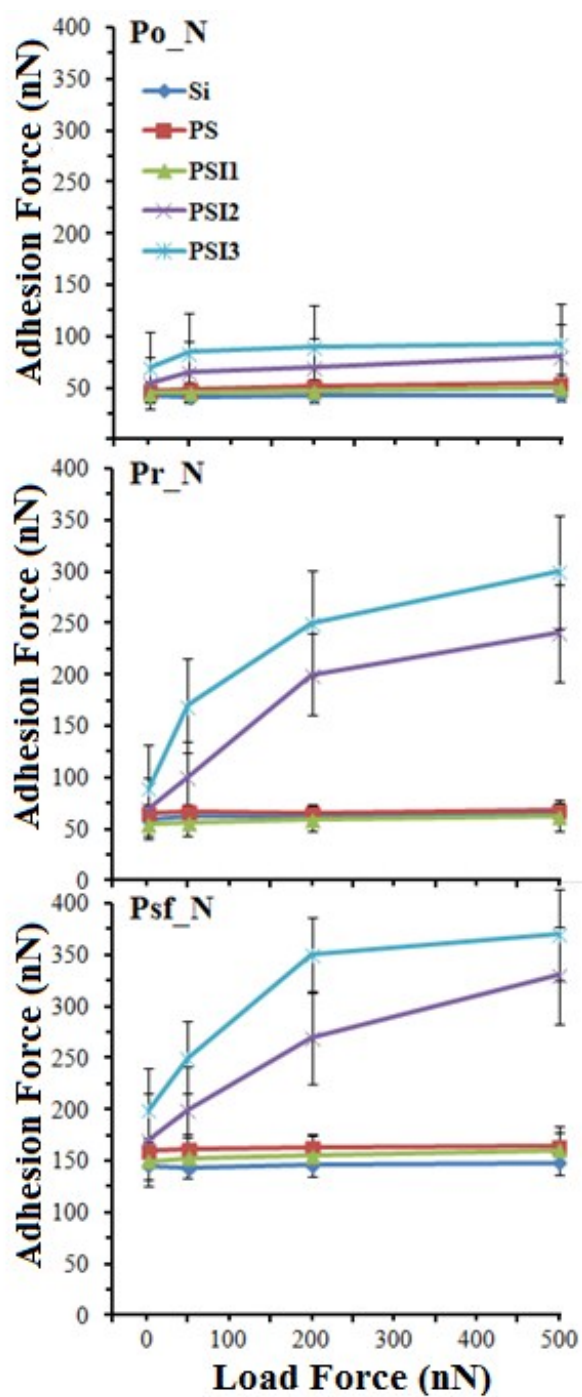

**Figure S7.** Adhesion forces versus load forces for the native pollen particles interacting with five different substrate surfaces. Error bars are 95% confidence intervals.

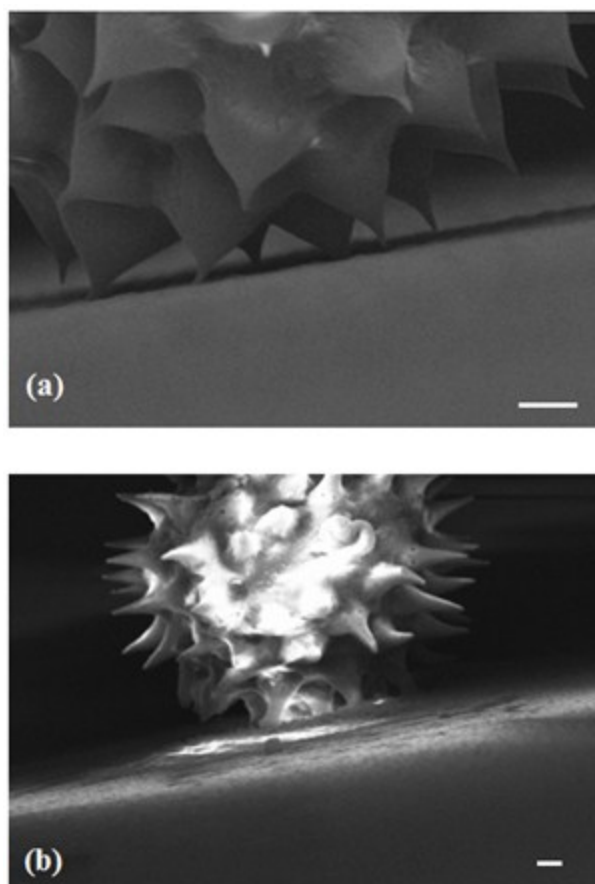

**Figure S8.** SEM images showing the multiple spines contact to surfaces for freely-settling (a) ragweed and (b) sunflower pollen particles on Si substrates. All scale bars are 1 μm.

Table S1. Possibility ( $p$ -value) of no significant difference of adhesion forces between each substrates under 2.5 nN and 500 nN load forces.

| $p$ -value        | Po_C                  | Pr_C                  | Psf_C                 |
|-------------------|-----------------------|-----------------------|-----------------------|
| 2.5 nN Load Force |                       |                       |                       |
| PS-PSI1           | 0.13                  | 0.32                  | 0.63                  |
| PS-PSI2           | $8.8 \times 10^{-4}$  | $2.1 \times 10^{-4}$  | $2.5 \times 10^{-3}$  |
| PS-PSI3           | $4.4 \times 10^{-7}$  | $1.2 \times 10^{-8}$  | $2.8 \times 10^{-8}$  |
| PSI1-PSI2         | $3.0 \times 10^{-7}$  | $2.2 \times 10^{-10}$ | $3.4 \times 10^{-11}$ |
| PSI1-PSI3         | $1.0 \times 10^{-10}$ | $1.2 \times 10^{-12}$ | $1.5 \times 10^{-13}$ |
| PSI2-PSI3         | 0.19                  | 0.16                  | 0.22                  |
| 500 nN Load Force |                       |                       |                       |
| PS-PSI1           | 0.45                  | 0.65                  | 0.86                  |
| PS-PSI2           | $3.7 \times 10^{-3}$  | $5.5 \times 10^{-3}$  | $4.3 \times 10^{-4}$  |
| PS-PSI3           | $4.6 \times 10^{-5}$  | $3.3 \times 10^{-6}$  | $5.0 \times 10^{-7}$  |
| PSI1-PSI2         | $2.3 \times 10^{-7}$  | $3.4 \times 10^{-8}$  | $2.4 \times 10^{-11}$ |
| PSI1-PSI3         | $2.1 \times 10^{-11}$ | $7.2 \times 10^{-10}$ | $2.8 \times 10^{-13}$ |
| PSI2-PSI3         | 0.12                  | 0.08                  | 0.09                  |
